# Supplementary material for: A Neural Network Based Intelligent Predictive Sensor for Cloudiness, Solar Radiation and Air Temperature
Source: MDPI journal article supplement (doi:10.3390/s121115750), 2012-11-12
Supplement: s1 [file s1]

Correction

**Correction: Ferreira, P.M., et al. A Neural Network Based Intelligent Predictive Sensor for Cloudiness, Solar Radiation and Air Temperature. *Sensors* 2012, 12, 15750–15777**

Pedro M. Ferreira <sup>1,2,†,\*</sup>, João M. Gomes <sup>3</sup>, Igor A. C. Martins <sup>3</sup> and António E. Ruano <sup>2,3</sup>

<sup>1</sup> Algarve Science and Technology Park, Campus de Gambelas, Pav. A5, 8005-139 Faro, Portugal

<sup>2</sup> Centre for Intelligent Systems, IDMEC-IST, Av. Rovisco Pais 1, 1049-001 Lisboa, Portugal;  
E-Mail: aruano@ualg.pt

<sup>3</sup> Department of Electronic and Informatics Engineering, University of Algarve, 8005-139 Faro, Portugal; E-Mails: joaomealhagomes@gmail.com (J.M.G.); roгимartins13@gmail.com (I.A.C.M.)

<sup>†</sup> Current address: Department of Informatics, Faculty of Sciences of the University of Lisbon, Edifício C6 Piso 3, Campo Grande, 1749-016 Lisboa, Portugal.

\* Author to whom correspondence should be addressed; E-Mail: pmf@fc.ul.pt;  
Tel.: +351-21-7500-645; Fax: +351-21-7500-084.

Received: 17 June 2013; in revised form: 18 June 2013 / Accepted: 18 June 2013 /

Published: 23 July 2013

---

The authors would like to correct the acknowledgements of this article [1] as follows:

**Acknowledgements**

The authors thank the Portuguese National Science and Technology Foundation for funding this work with projects PTDC/ENR/73345/2006 and PTDC/SEN-ENR/115974/2009, and the University of Algarve for the Ceratonia 2008 Award. The first author thanks the European Commission for the grant PERG-GA-2008-239451.

The authors would like to apologize for any inconvenience this may have caused to the readers.

## Reference

1. Ferreira, P.M.; Gomes, J.M.; Martins, I.A.C.; Ruano, A.E. A Neural Network Based Intelligent Predictive Sensor for Cloudiness, Solar Radiation and Air Temperature. *Sensors* **2012**, *12*, 15750–15777.

© 2013 by the authors; licensee MDPI, Basel, Switzerland. This article is an open access article distributed under the terms and conditions of the Creative Commons Attribution license (<http://creativecommons.org/licenses/by/3.0/>).
